# Supplementary material for: Maternal B cell signaling orchestrates fetal development in mice
Source: Oxford University Press journal article supplement (doi:10.1242/dev.199783), 2021-09-16
Supplement: dev199783supp.pdf [file dev199783supp.pdf]

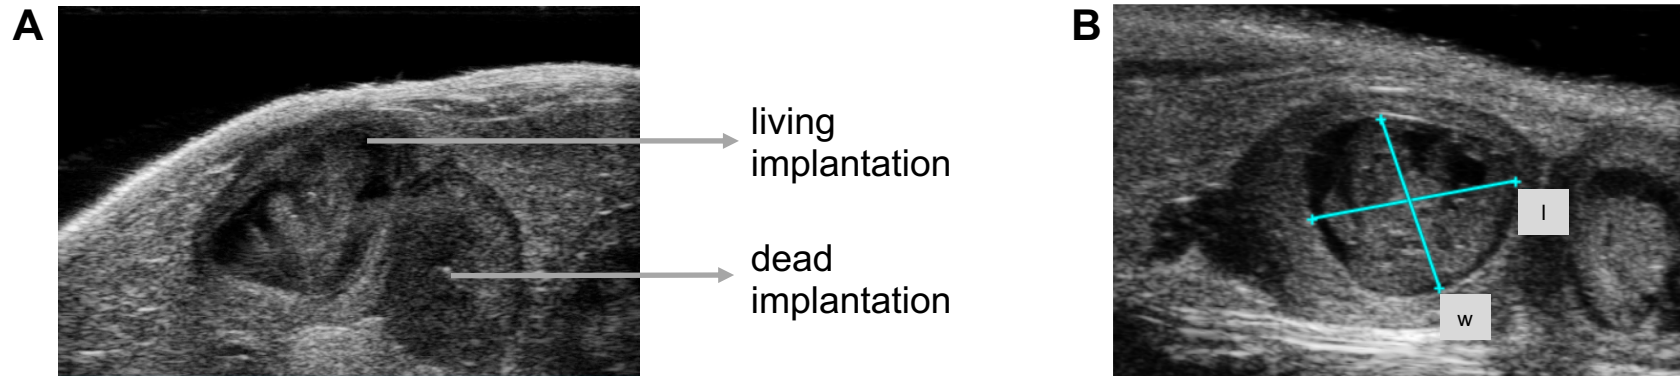

### Fig. S1. Ultrasound imaging

(A) A representative picture of a BIL-10<sup>-/-</sup> dam carrying a dead implantation beside a living implantation. (B) The amniotic cavity from a dam at gd10 measuring its length (l) and width (w).

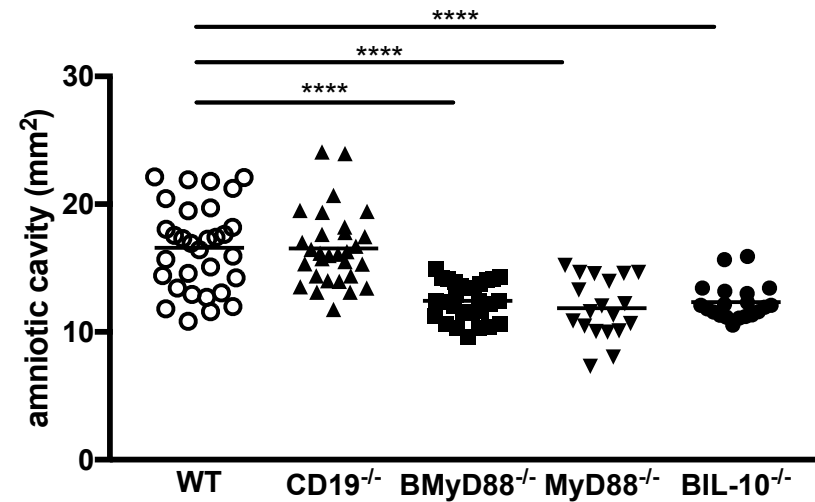

### Fig. S2. Fetal weight on gd17

WT, CD19<sup>-/-</sup>, BMyD88<sup>-/-</sup>, MyD88<sup>-/-</sup> and BIL-10<sup>-/-</sup> dams were injected with 200 $\mu$ l PBS on gd16. Since these dams did not deliver, they were sacrificed 24h later and the fetal weight was determined. Data were analyzed by Kruskal-Wallis test and Dunn's multiple comparisons test. n=19-31; \*\*\*\*p<0.0001.
